# Supplementary material for: Electronic, mechanical and gas sensing properties of two-dimensional γ-SnSe
Source: Royal Society of Chemistry journal article supplement (doi:10.1039/d3cp03483f), 2023-01-01
Supplement: d3cp03483f1.pdf [file d3cp03483f1.pdf]

## Supporting information for

### Electronic, mechanical and gas sensing properties of two-dimensional $\gamma$ -SnSe

Chunyan Zhu,<sup>1,#</sup> Tianhang Feng,<sup>1,#</sup> Xinying Jiang,<sup>1</sup> Gang Li,<sup>2,\*</sup> Jun-Hui Yuan,<sup>3</sup> Chao Liu,<sup>1,\*</sup> Pan Zhang,<sup>4</sup> and Jiafu Wang<sup>3</sup>

<sup>1</sup>Key Laboratory of Cognitive Science of State Ethnic Affairs Commission, Hubei Key Laboratory of Medical Information Analysis and Tumor Diagnosis and Treatment, College of Biomedical Engineering, South-Central Minzu University, Wuhan 430074, China

<sup>2</sup>College of Railway Rolling Stock, Wuhan Railway Vocational College of Technology, Wuhan 430205, China

<sup>3</sup>School of Science, Wuhan University of Technology, Wuhan 430070, China

<sup>4</sup>National Key Laboratory of Advanced Micro and Nano Manufacture Technology, School of Integrated Circuits, Peking University, Beijing 100871, China

#### AUTHOR INFORMATION

##### \*Corresponding Author

E-mail: [lig\\_csu@foxmail.com](mailto:lig_csu@foxmail.com) (G. Li); [chaoliu@scuec.edu.cn](mailto:chaoliu@scuec.edu.cn) (C. Liu)

<sup>#</sup>Chunyan Zhu and Tianhang Feng contributed equally to this work.

**Table S1.** The optimized structural parameters of monolayer and multilayer  $\gamma$ -SnSe.

| <b>Model</b> | <b><math>a</math> (Å)</b> | <b><math>b</math> (Å)</b> | <b><math>c</math> (Å) (includes vacuum layer thickness)</b> |
|--------------|---------------------------|---------------------------|-------------------------------------------------------------|
| Monolayer    | 3.906                     | 6.207                     | 22.417                                                      |
| Bilayer      | 3.998                     | 6.202                     | 26.594                                                      |
| Trilayer     | 4.041                     | 6.195                     | 30.771                                                      |
| Four-layer   | 4.068                     | 6.190                     | 34.948                                                      |
| Five-layer   | 4.085                     | 6.187                     | 39.125                                                      |

**Table S2.** The corresponding bond angles of optimized monolayer and multilayer  $\gamma$ -SnSe.

| <b>Model</b> | <b>layer</b> | <b><math>\theta_1</math> (°)</b> | <b><math>\theta_2</math> (°)</b> | <b><math>\theta_3</math> (°)</b> | <b><math>\theta_4</math> (°)</b> | <b><math>\theta_5</math> (°)</b> |
|--------------|--------------|----------------------------------|----------------------------------|----------------------------------|----------------------------------|----------------------------------|
| Monolayer    | 1            | 91.347                           | 98.003                           | 91.014                           | 91.347                           | 91.014                           |
| Bilayer      | 2-1          | 91.605                           | 100.487                          | 92.824                           | 90.004                           | 92.969                           |
|              | 2-2          | 91.605                           | 100.487                          | 92.824                           | 90.004                           | 92.969                           |
| Tri-layer    | 3-1          | 91.852                           | 100.530                          | 93.554                           | 89.751                           | 93.789                           |
|              | 3-2          | 90.513                           | 102.638                          | 93.330                           | 90.513                           | 93.330                           |
|              | 3-3          | 89.751                           | 102.556                          | 93.789                           | 91.852                           | 93.554                           |
| Four-layer   | 4-1          | 91.913                           | 100.600                          | 94.077                           | 89.601                           | 94.344                           |
|              | 4-2          | 90.194                           | 103.265                          | 93.601                           | 90.590                           | 93.502                           |
|              | 4-3          | 90.194                           | 103.265                          | 93.601                           | 90.590                           | 93.502                           |
|              | 4-4          | 91.913                           | 100.600                          | 94.077                           | 89.601                           | 94.344                           |
| Five-layer   | 5-1          | 91.944                           | 100.594                          | 94.420                           | 89.587                           | 94.715                           |
|              | 5-2          | 89.976                           | 103.508                          | 93.822                           | 90.667                           | 93.729                           |
|              | 5-3          | 90.202                           | 103.510                          | 93.499                           | 90.202                           | 93.499                           |
|              | 5-4          | 90.667                           | 102.850                          | 93.729                           | 89.976                           | 93.822                           |
|              | 5-5          | 89.587                           | 102.859                          | 94.715                           | 91.944                           | 94.420                           |

**Table S3.** The corresponding bond lengths and the interlayer distances of optimized monolayer and multilayer  $\gamma$ -SnSe.

| <b>Model</b> | <b>layer</b> | $l_1$ (Å) | $l_2$ (Å) | $l_3$ (Å) | $l_4$ (Å) | $d$ (Å) |
|--------------|--------------|-----------|-----------|-----------|-----------|---------|
| Monolayer    | 1            | 2.738     | 2.890     | 2.738     | 2.890     | /       |
| Bilayer      | 2-1          | 2.756     | 2.814     | 2.760     | 2.857     | /       |
|              | 2-2          | 2.756     | 2.814     | 2.760     | 2.857     | 2.159   |
| Trilayer     | 3-1          | 2.767     | 2.799     | 2.773     | 2.851     | /       |
|              | 3-2          | 2.778     | 2.811     | 2.778     | 2.811     | 2.058   |
|              | 3-3          | 2.773     | 2.851     | 2.767     | 2.799     | 2.058   |
| Four-layer   | 4-1          | 2.773     | 2.791     | 2.779     | 2.849     | /       |
|              | 4-2          | 2.792     | 2.806     | 2.790     | 2.799     | 2.017   |
|              | 4-3          | 2.792     | 2.806     | 2.790     | 2.799     | 1.943   |
|              | 4-4          | 2.773     | 2.791     | 2.779     | 2.849     | 2.017   |
| Five-layer   | 5-1          | 2.777     | 2.790     | 2.783     | 2.847     | /       |
|              | 5-2          | 2.799     | 2.808     | 2.797     | 2.794     | 1.996   |
|              | 5-3          | 2.804     | 2.797     | 2.804     | 2.797     | 1.897   |
|              | 5-4          | 2.797     | 2.794     | 2.799     | 2.808     | 1.897   |
|              | 5-5          | 2.783     | 2.847     | 2.777     | 2.790     | 1.996   |

**Table S4.** The independent elastic constants  $C_{11}$ ,  $C_{22}$ ,  $C_{12}$ ,  $C_{66}$  of monolayer and multilayer  $\gamma$ -SnSe.

| <b>Model</b> | $C_{11}$ | $C_{22}$ | $C_{12}$ | $C_{66}$ |
|--------------|----------|----------|----------|----------|
| Monolayer    | 24.329   | 25.729   | -0.598   | 6.161    |
| Bilayer      | 39.512   | 47.117   | 3.201    | 15.736   |
| Tri-layer    | 53.831   | 72.170   | 5.678    | 25.036   |
| Four-layer   | 69.040   | 100.287  | 9.003    | 34.791   |
| Five-layer   | 88.137   | 129.780  | 11.182   | 45.371   |

**Table S5.** The maximum and minimum Young's modulus ( $\text{N m}^{-1}$ ) and Poisson's ratios of monolayer and multilayer  $\gamma$ -SnSe.

| Model      | $Y_{\text{max}}$ | $Y_{\text{min}}$ | $\nu_{\text{max}}$ | $\nu_{\text{min}}$ |
|------------|------------------|------------------|--------------------|--------------------|
| Monolayer  | 25.715           | 16.377           | 0.329              | -0.025             |
| Bilayer    | 46.858           | 36.986           | 0.190              | 0.068              |
| Tri-layer  | 71.571           | 53.384           | 0.148              | 0.079              |
| Four-layer | 99.113           | 68.232           | 0.137              | 0.090              |
| Five-layer | 128.361          | 87.173           | 0.129              | 0.086              |

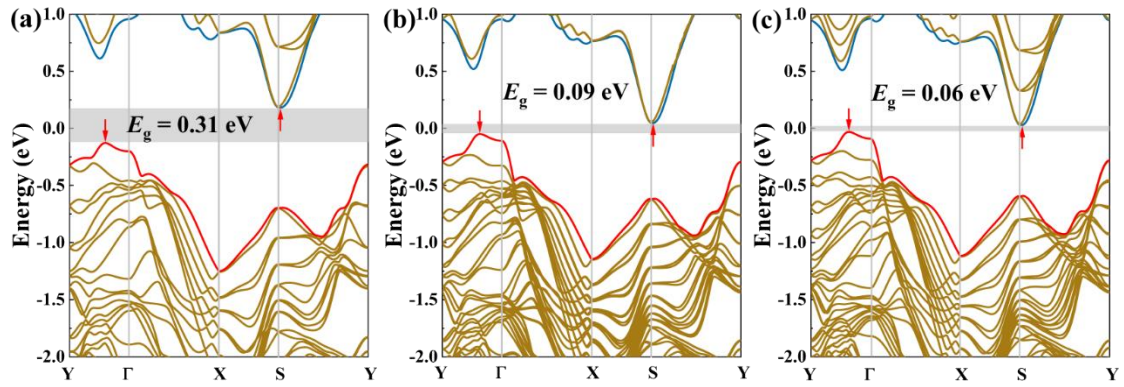

**Figure S1.** Electronic band structure of (a) six-layer, (b) nine-layer and (c) ten-layer  $\gamma$ -SnSe based on PBE+SOC calculation.

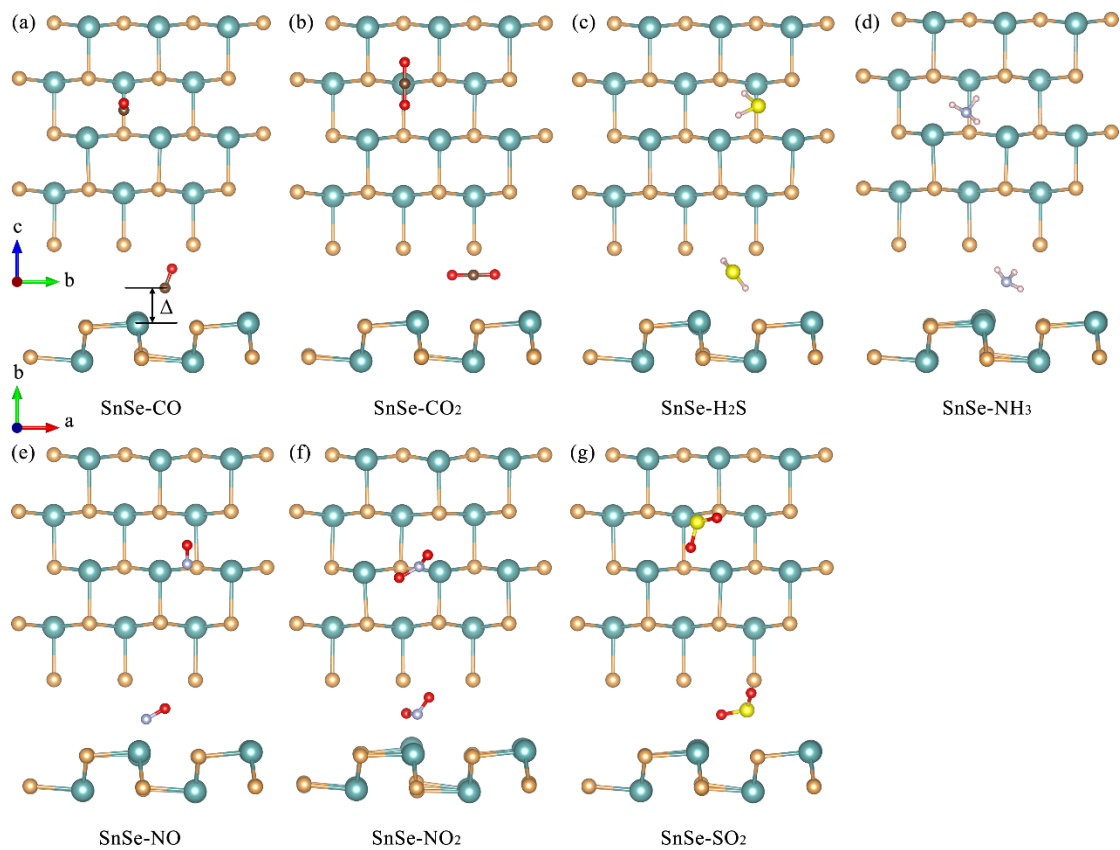

**Figure S2.** The most stable configurations of gas molecules (CO, CO<sub>2</sub>, H<sub>2</sub>S, NH<sub>3</sub>, NO, NO<sub>2</sub>, and SO<sub>2</sub>) adsorbed on the ML  $\gamma$ -SnSe.
